# Supplementary material
Source: PubMed Central journal article supplement (PMC8096487)

## WEB MATERIAL

### Association Between Immune Response to Cytomegalovirus and Cognition in the Health and Retirement Study

Rebecca C. Stebbins, Grace A. Noppert, Yang Claire Yang, Jennifer B. Dowd, Amanda Simanek, and Allison E. Aiello

Correspondence to Rebecca C. Stebbins, Department of Epidemiology, Gillings School of Global Public Health, University of North Carolina at Chapel Hill, 123 West Franklin Street, Building C, Chapel Hill, North Carolina 27599 (e-mail: [rebecca7@email.unc.edu](mailto:rebecca7@email.unc.edu)).

#### Author affiliations:

Department of Epidemiology, University of North Carolina at Chapel Hill, Chapel Hill, North Carolina (Rebecca C. Stebbins, Grace A. Noppert, Allison E. Aiello); Carolina Population Center, University of North Carolina at Chapel Hill, Chapel Hill, North Carolina (Grace A. Noppert, Yang Claire Yang, Allison E. Aiello); Department of Sociology, University of North Carolina at Chapel Hill, Chapel Hill, North Carolina (Yang Claire Yang); Leverhulme Centre for Demographic Science, Department of Sociology, University of Oxford, Oxford, United Kingdom (Jennifer B. Dowd); and Joseph J. Zilber School of Public Health, University of Wisconsin-Milwaukee, Milwaukee, Wisconsin (Amanda Simanek).

#### Table of Contents:

|                   |   |
|-------------------|---|
| Web Table 1 ..... | 2 |
| Web Table 2 ..... | 3 |
| Web Table 3.....  | 4 |
| Web Table 4.....  | 5 |
| Web Figure 1..... | 6 |

**Web Table 1.** Linear Model Estimates of CMV Seropositivity and Cognition Adjusted for Comorbidity ( $n = 5,617$ ), Health and Retirement Study, 2016

| Variable               | Model 3  |              |
|------------------------|----------|--------------|
|                        | Estimate | 95% CI       |
| Intercept              | 20.68    | 20.23, 21.14 |
| CMV                    |          |              |
| Seropositive           | -0.18    | -0.44, 0.09  |
| Seronegative           |          |              |
| Age                    | -0.17    | -0.19, -0.15 |
| Age <sup>2</sup>       | -0.01    | -0.01, 0.00  |
| Sex                    | Referent |              |
| Male                   | -0.83    | -1.05, -0.60 |
| Female                 |          |              |
| Educational attainment |          |              |
| Less than HS           | 3.09     | 2.75, 3.43   |
| HS diploma             | 4.00     | 3.63, 4.37   |
| Some college           | 5.69     | 5.31, 6.07   |
| College +              | Referent |              |
| Race/ethnicity         |          |              |
| Non-Hispanic White     | Referent |              |
| Non-Hispanic Black     | -2.85    | -3.19, -2.52 |
| Hispanic               | -1.60    | -2.01, -1.20 |
| Other                  | -2.17    | -2.91, -1.44 |
| Comorbidity            | -2.01    | -2.60, -1.41 |

Abbreviations: CI, confidence interval; CMV, cytomegalovirus; HS, high school.

**Web Table 2.** Linear Model Estimates of CMV IgG Tertiles and Cognition Adjusted for Comorbidity ( $n = 5,617$ ), Health and Retirement Study, 2016

| Variable               | Model 3  |              |
|------------------------|----------|--------------|
|                        | Estimate | 95% CI       |
| Intercept              | 20.69    | 20.23, 21.15 |
| CMV                    |          |              |
| Tertile 3              | -0.19    | -0.51, 0.14  |
| Tertile 2              | -0.27    | -0.59, 0.06  |
| Tertile 1              | -0.09    | -0.41, 0.23  |
| Seronegative           | Referent |              |
| Age                    | -0.17    | -0.19, -0.15 |
| Age <sup>2</sup>       | -0.01    | -0.01, 0.00  |
| Sex                    |          |              |
| Male                   | -0.83    | -1.06, -0.60 |
| Female                 | Referent |              |
| Educational attainment |          |              |
| Less than HS           | 3.09     | 2.74, 3.43   |
| HS diploma             | 3.99     | 3.62, 4.36   |
| Some college           | 5.69     | 5.30, 6.07   |
| College +              | Referent |              |
| Race/ethnicity         |          |              |
| Non-Hispanic White     | Referent |              |
| Non-Hispanic Black     | -2.85    | -3.19, -2.51 |
| Hispanic               | -1.60    | -2.00, -1.19 |
| Other                  | -2.18    | -2.91, -1.44 |
| Comorbidity            | -2.01    | -2.60, -1.41 |

Abbreviations: CI, confidence interval; CMV, cytomegalovirus; HS, high school.

**Web Table 3.** Educational Attainment–Stratified Linear Model Estimates of CMV Seropositivity and Cognition Adjusted for Comorbidity ( $n = 5,617$ ), Health and Retirement Study, 2016

| Variable           | Educational Attainment |        |            |          |        |              |          |        |           |          |        |       |
|--------------------|------------------------|--------|------------|----------|--------|--------------|----------|--------|-----------|----------|--------|-------|
|                    | < HS                   |        | HS Diploma |          |        | Some College |          |        | College + |          |        |       |
|                    | Estimate               | 95% CI |            | Estimate | 95% CI |              | Estimate | 95% CI |           | Estimate | 95% CI |       |
| Intercept          | 21.24                  | 20.05, | 22.43      | 23.90    | 23.32, | 24.48        | 24.21    | 23.57, | 24.85     | 26.35    | 25.80, | 26.89 |
| CMV                |                        |        |            |          |        |              |          |        |           |          |        |       |
| Seropositive       | -0.36                  | -1.43, | 0.71       | -0.02    | -0.49, | 0.44         | -0.18    | -0.69, | 0.32      | -0.34    | -0.76, | 0.08  |
| Seronegative       | Referent               |        |            |          |        |              |          |        |           |          |        |       |
| Age                | -0.16                  | -0.22, | -0.10      | -0.16    | -0.19, | -0.12        | -0.18    | -0.22, | -0.14     | -0.17    | -0.21, | -0.14 |
| Age <sup>2</sup>   | -0.01                  | -0.01, | 0.00       | -0.01    | -0.01, | 0.00         | 0.00     | -0.01, | 0.00      | -0.01    | -0.01, | -0.01 |
| Sex                |                        |        |            |          |        |              |          |        |           |          |        |       |
| Female             | -0.35                  | -0.96, | 0.27       | -1.19    | -1.58, | -0.81        | -0.75    | -1.22, | -0.28     | -0.66    | -1.07, | -0.25 |
| Male               | Referent               |        |            |          |        |              |          |        |           |          |        |       |
| Race/ethnicity     |                        |        |            |          |        |              |          |        |           |          |        |       |
| Non-Hispanic White | Referent               |        |            |          |        |              |          |        |           |          |        |       |
| Non-Hispanic Black | -3.15                  | -3.96, | -2.34      | -3.20    | -3.76, | -2.64        | -2.88    | -3.55, | -2.20     | -1.79    | -2.55, | -1.03 |
| Hispanic           | -2.07                  | -2.83, | -1.31      | -1.61    | -2.36, | -0.86        | -1.12    | -2.05, | -0.19     | -1.02    | -2.29, | 0.24  |
| Other              | -3.16                  | -5.15, | -1.17      | -2.69    | -3.99, | -1.38        | -1.84    | -3.39, | -0.30     | -1.32    | -2.55, | -0.08 |
| Comorbidity        | -2.77                  | -4.35, | -1.19      | -2.21    | -3.21, | -1.20        | -1.18    | -2.41, | 0.05      | -1.91    | -3.04, | -0.78 |

Abbreviations: CI, confidence interval; CMV, cytomegalovirus; HS, high school.

**Web Table 4.** Educational Attainment–Stratified Linear Model Estimates of CMV IgG Tertiles and Cognition Adjusted for Comorbidity ( $n = 5,617$ ), Health and Retirement Study, 2016

| Variable           | Educational Attainment |        |       |            |        |       |              |        |       |           |        |       |
|--------------------|------------------------|--------|-------|------------|--------|-------|--------------|--------|-------|-----------|--------|-------|
|                    | < HS                   |        |       | HS Diploma |        |       | Some College |        |       | College + |        |       |
|                    | Estimate               | 95% CI |       | Estimate   | 95% CI |       | Estimate     | 95% CI |       | Estimate  | 95% CI |       |
| Intercept          | 21.23                  | 20.04, | 22.43 | 23.91      | 23.33, | 24.49 | 24.21        | 23.57, | 24.85 | 26.36     | 25.81, | 26.90 |
| CMV                |                        |        |       |            |        |       |              |        |       |           |        |       |
| Tertile 3          | -0.15                  | -1.30, | 1.00  | 0.22       | -0.33, | 0.77  | -0.12        | -0.74, | 0.50  | -0.09     | -0.63, | 0.45  |
| Tertile 2          | -0.25                  | -1.40, | 0.91  | -0.09      | -0.64, | 0.47  | -0.26        | -0.91, | 0.40  | -0.69     | -1.24, | -0.15 |
| Tertile 1          | -0.74                  | -1.91, | 0.44  | -0.22      | -0.77, | 0.33  | -0.19        | -0.84, | 0.45  | -0.20     | -0.81, | 0.41  |
| Seronegative       | Referent               |        |       |            |        |       |              |        |       |           |        |       |
| Age                | -0.16                  | -0.21, | -0.10 | -0.16      | -0.19, | -0.12 | -0.18        | -0.22, | -0.14 | -0.17     | -0.21, | -0.14 |
| Age <sup>2</sup>   | -0.01                  | -0.01, | 0.00  | -0.01      | -0.01, | 0.00  | 0.00         | -0.01, | 0.00  | -0.01     | -0.01, | -0.01 |
| Sex                |                        |        |       |            |        |       |              |        |       |           |        |       |
| Male               | -0.28                  | -0.90, | 0.34  | -1.24      | -1.63, | -0.85 | -0.75        | -1.22, | -0.28 | -0.67     | -1.07, | -0.26 |
| Female             | Referent               |        |       |            |        |       |              |        |       |           |        |       |
| Race/ethnicity     |                        |        |       |            |        |       |              |        |       |           |        |       |
| Non-Hispanic White | -3.18                  | -3.99, | -2.37 | -3.18      | -3.75, | -2.62 | -2.87        | -3.55, | -2.19 | -1.79     | -2.55, | -1.03 |
| Non-Hispanic Black | -2.07                  | -2.83, | -1.31 | -1.58      | -2.33, | -0.83 | -1.11        | -2.04, | -0.19 | -1.01     | -2.27, | 0.26  |
| Hispanic           | -3.13                  | -5.12, | -1.14 | -2.67      | -3.97, | -1.36 | -1.84        | -3.39, | -0.30 | -1.38     | -2.61, | -0.15 |
| Other              | Referent               |        |       |            |        |       |              |        |       |           |        |       |
| Comorbidity        | -2.83                  | -4.41, | -1.25 | -2.18      | -3.19, | -1.18 | -1.18        | -2.41, | 0.05  | -1.91     | -3.04, | -0.78 |

Abbreviations: CI, confidence interval; CMV, cytomegalovirus; HS, high school.

**Web Figure 1.** Sample flow chart showing how the study sample was derived (final study sample:  $n = 5,617$ ), Health and Retirement Study, 2016

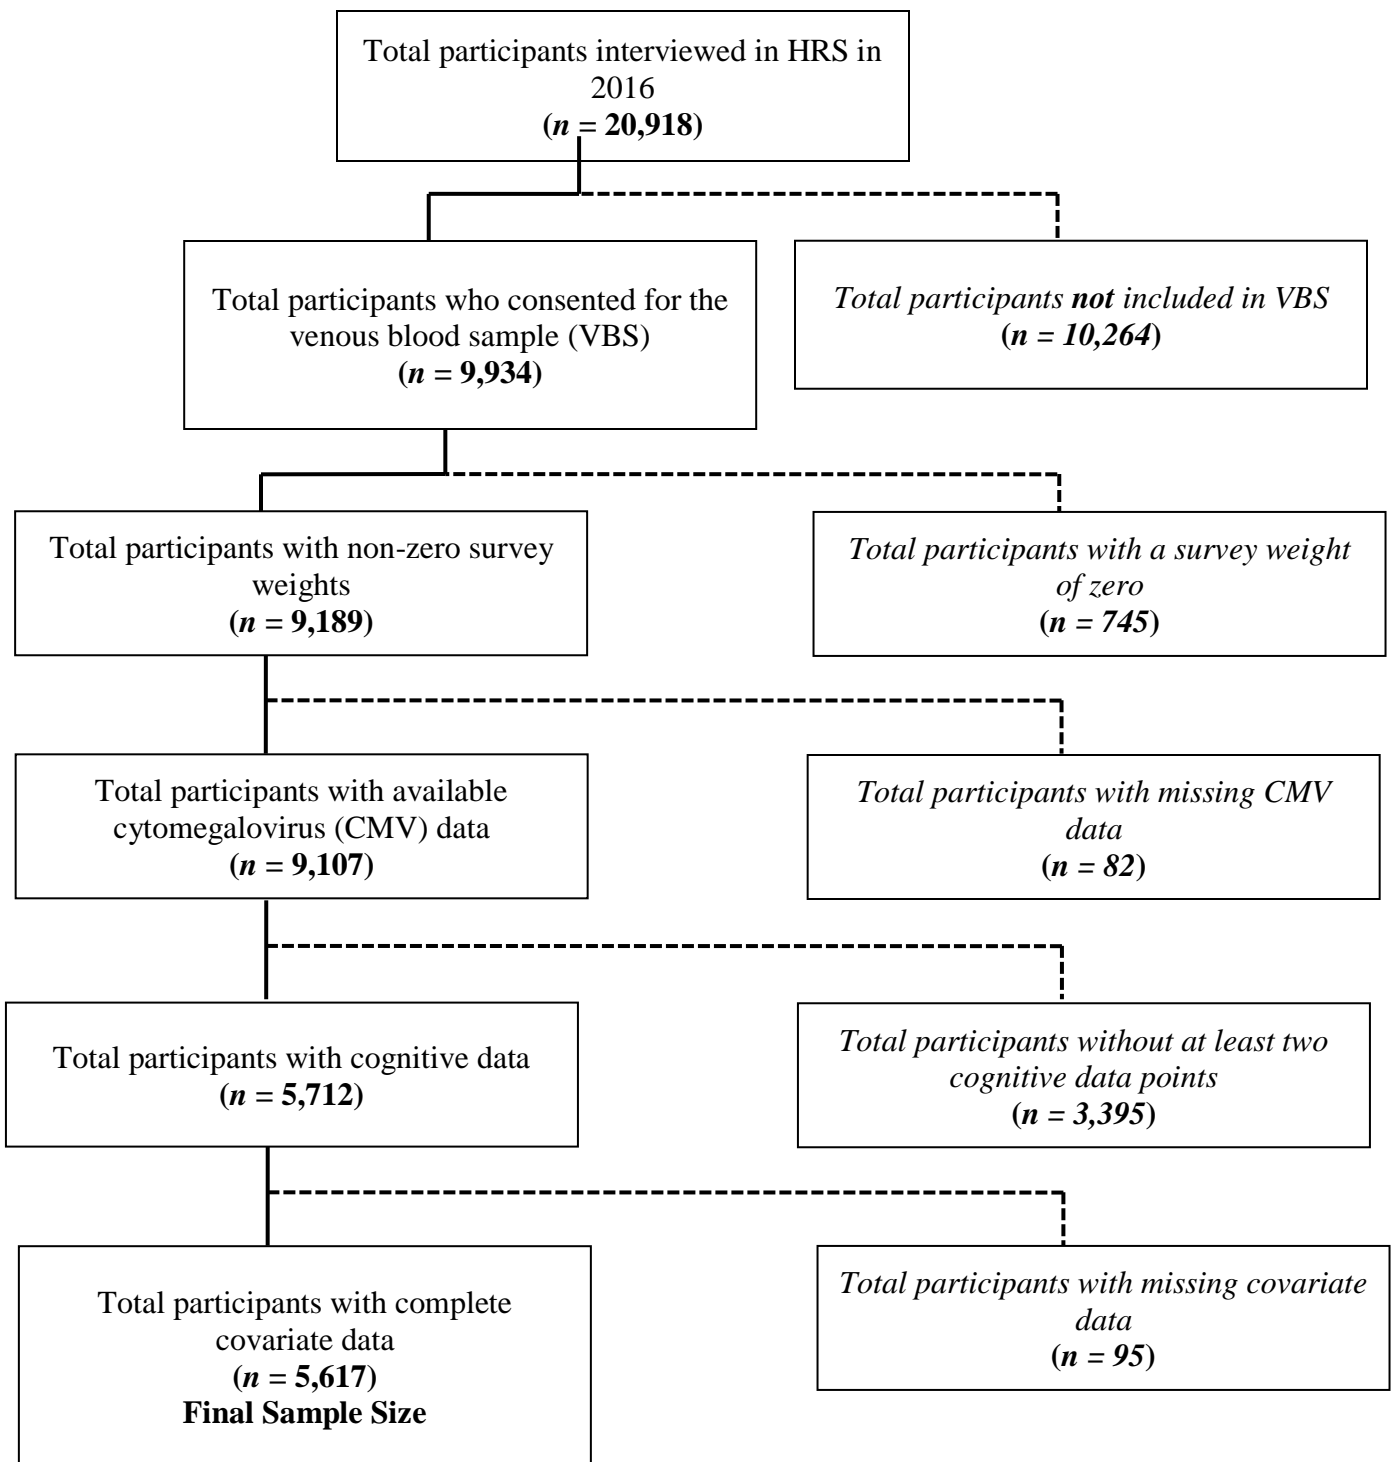

Supplement: web_material_kwaa238.pdf [file web_material_kwaa238.pdf]
